# Supplementary material for: Role of hydroxylation for the atomic structure of a non-polar vicinal zinc oxide
Source: PubMed Central journal article supplement (PMC9814410; doi:10.1038/s42004-020-00442-6), 2021-01-20
Supplement: 42004_2020_442_MOESM2_ESM.pdf [file 42004_2020_442_MOESM2_ESM.pdf]

## **Description of Additional Supplementary Files**

File name: Supplementary Data 1

Description: Structure of the bare Model A, used for the SXR D fits.

File name: Supplementary Data 2

Description: Structure of the bare Model B, used for the SXR D fits.

File name: Supplementary Data 3

Description: Structure of the bare Model C, used for the SXR D fits.

File name: Supplementary Data 4

Description: Structure of Model A with one additional O-atom, used for the SXR D fits.

File name: Supplementary Data 5

Description: Comparison of the measured and calculated structure factors for the full set of CTRs.
